# Supplementary material for: Motor training improves coordination and anxiety in symptomatic Mecp2-null mice despite impaired functional connectivity within the motor circuit
Source: PubMed Central journal article supplement (PMC8535852; doi:10.1126/sciadv.abf7467), 2021-10-22
Supplement: sciadv.abf7467_sm.pdf [file sciadv.abf7467_sm.pdf]

Supplementary Materials for

**Motor training improves coordination and anxiety in symptomatic  
*Mecp2*-null mice despite impaired functional connectivity  
within the motor circuit**

Yuanlei Yue, Pan Xu, Zhichao Liu, Xiaoqian Sun, Juntao Su, Hongfei Du, Lingling Chen,  
Ryan T. Ash, Stelios Smirnakis, Rahul Simha, Linda Kusner, Chen Zeng, Hui Lu\*

\*Corresponding author. Email: huilu@email.gwu.edu

Published 22 October 2021, *Sci. Adv.* 7, eabf7467 (2021)  
DOI: 10.1126/sciadv.abf7467

**The PDF file includes:**

Figs. S1 to S13  
Table S1  
Legends for movies S1 to S4

**Other Supplementary Material for this manuscript includes the following:**

Movies S1 to S4



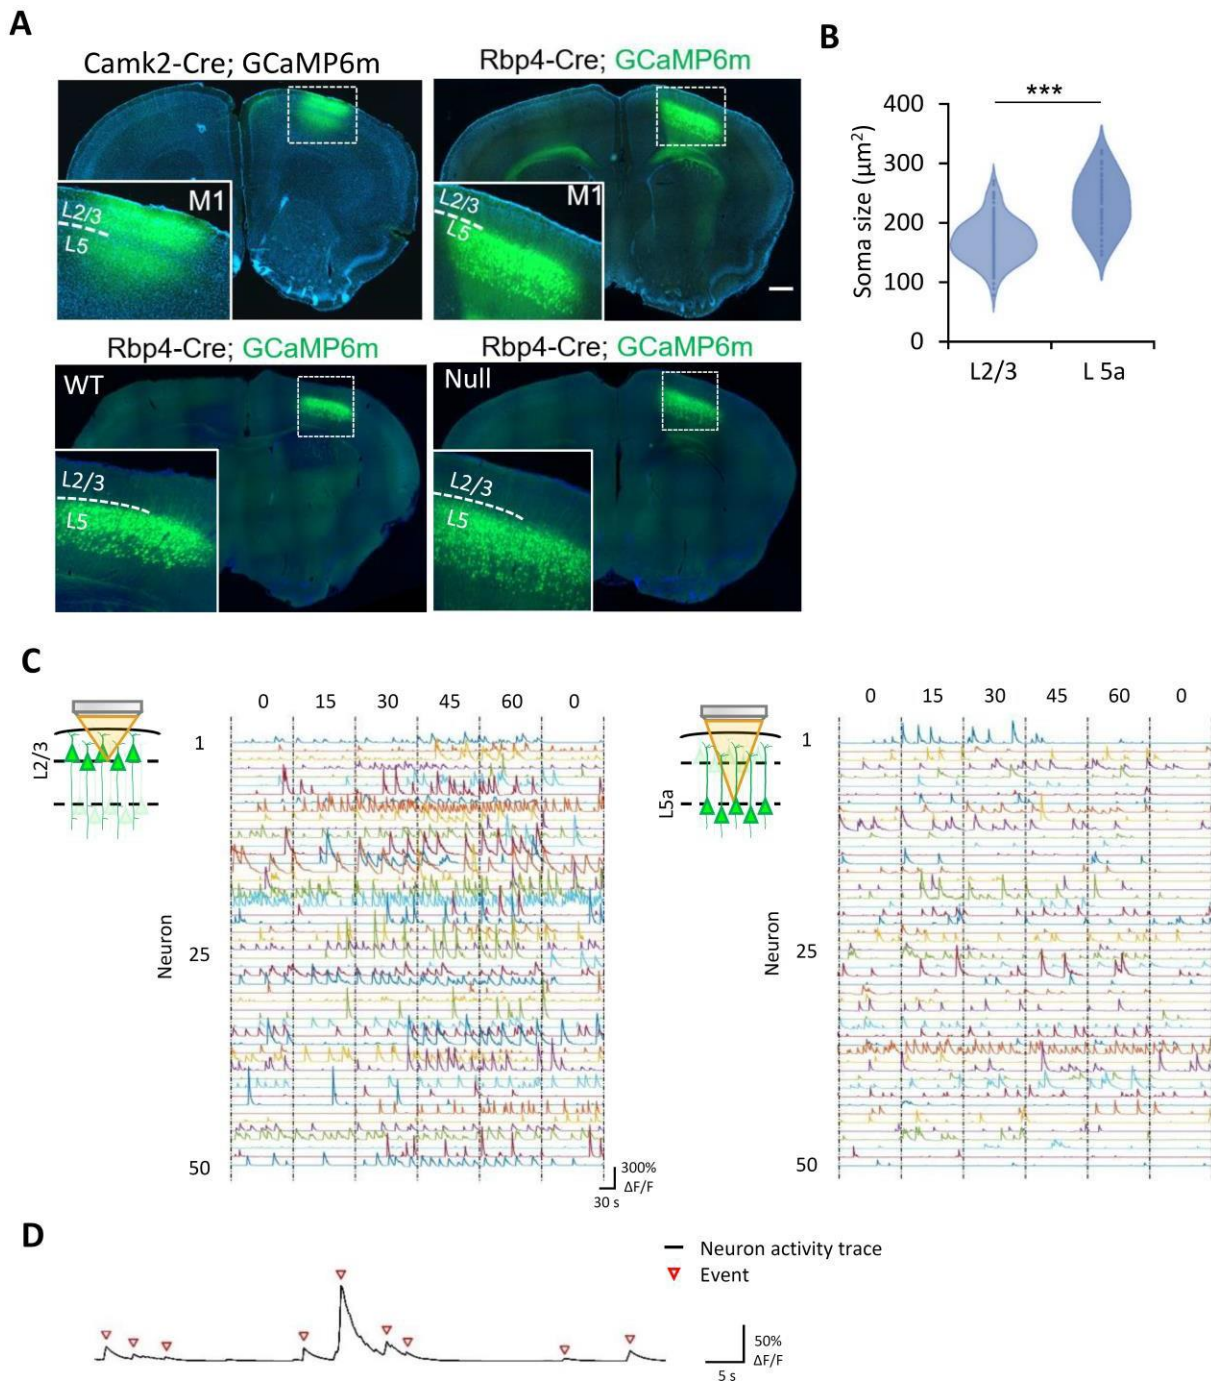

**Fig. S2. Confirmation of imaging location and processing of imaging data.** (A) Images of coronal sections showing expression of GCaMP6m in the area M1. Magnification of the boxed area is shown in the lower left corner of the larger images. Top, Rbp4-Cre-induced expression confirms the depth of L5a is around 400–450  $\mu\text{m}$ . Bottom, no noticeable difference of the depth of L5a between the WT and *Mecp2*-null mouse. Scale: 500  $\mu\text{m}$ . (B) Violin plot with the addition of a rotated kernel density plot on each side comparing the soma size of detected neurons in L2/3 and L5a. \*\*\*  $P < 0.001$  (Rank sum test) (C) Pre-processed sample traces of calcium dynamics in 50 neurons in L2/3 (left) and L5a (right) of one mouse during increase-speed mode. (D) Denoised neuronal activity trace; red triangles point to events.

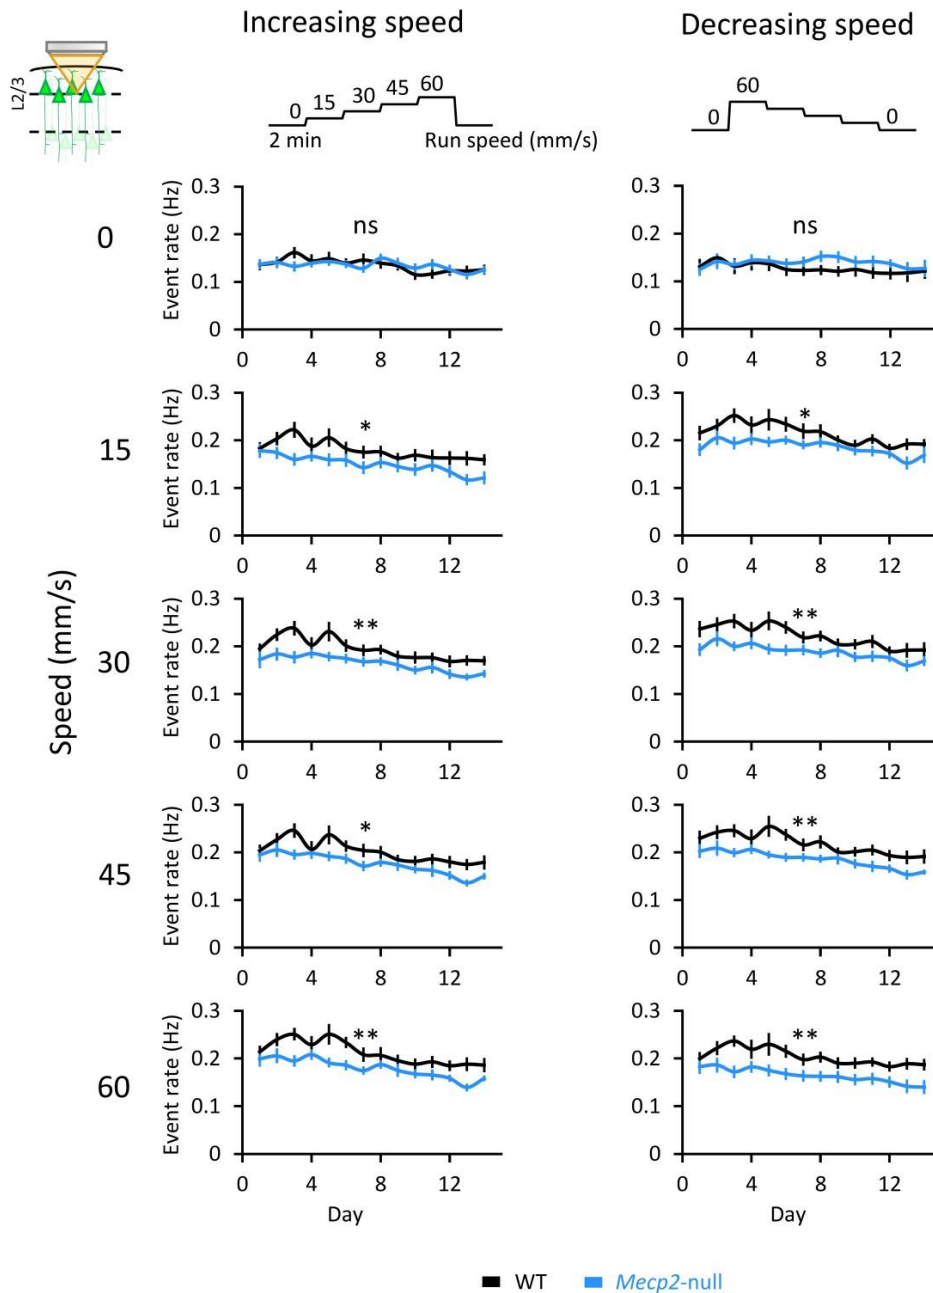

**Fig. S3. Comparison of firing rates at different speeds in M1 area L2/3.** Summary of event rates of WT and null neurons in L2/3 in session 1 (left, speeding-up mode) and session 2 (right, slowing-down mode) at each speed. WT: n=13 mice; Null, n=14 mice. Error bars represent mean  $\pm$  SE. ns, not significant; \*  $P < 0.05$ ; \*\*  $P < 0.01$ , RM-ANOVA test.

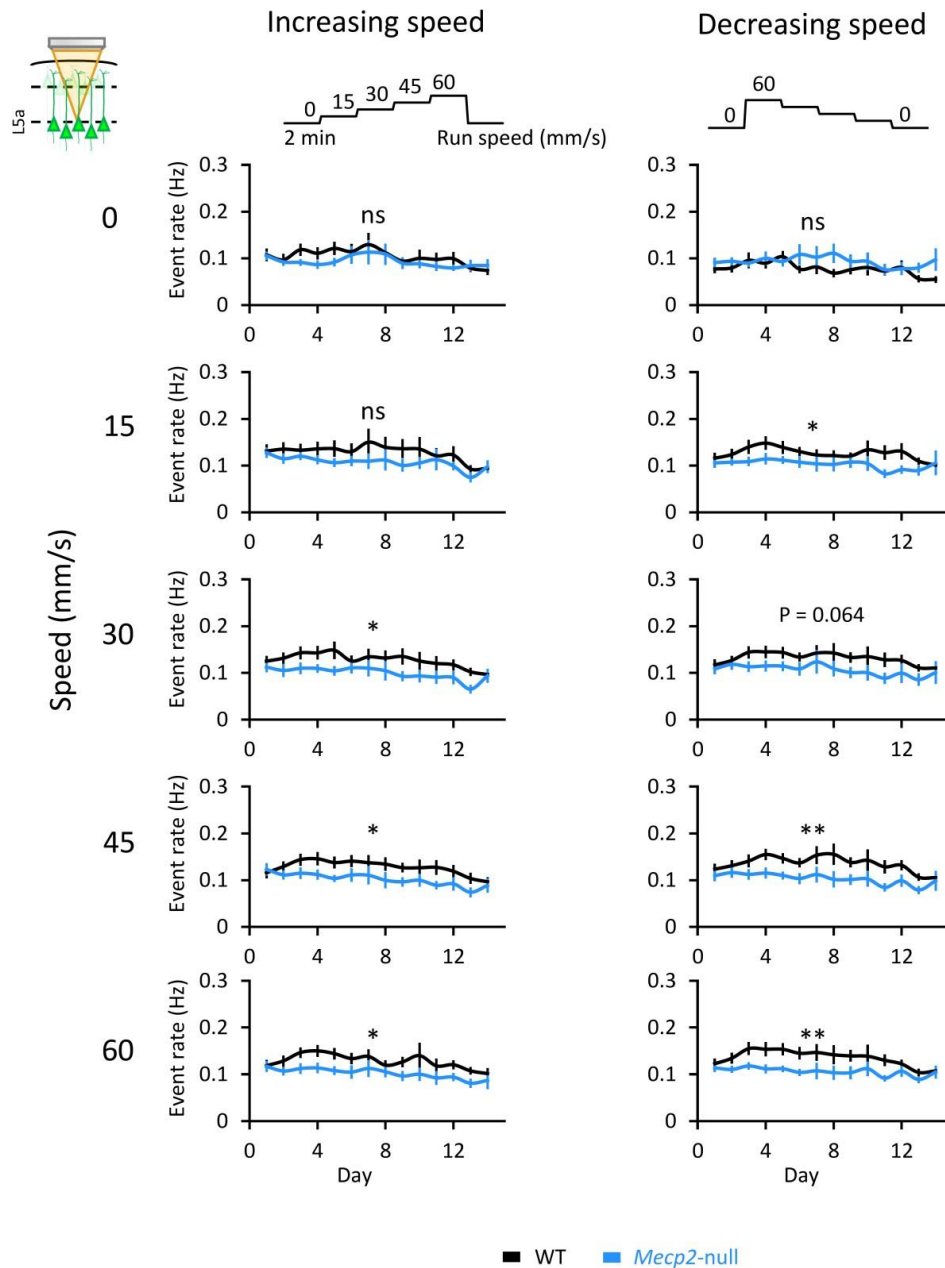

**Fig. S4. Comparison of L5a firing rates at different speeds.** Summary of event rates of WT and Nullneurons in L5a in session 1 (left, speeding-up mode) and session 2 (right, slowing-down mode) at each speed. WT: n=11 mice; Null, n=13 mice. Error bars represent mean  $\pm$  SE. \*  $P < 0.05$ ; \*\*  $P < 0.01$ , RM-ANOVA test.

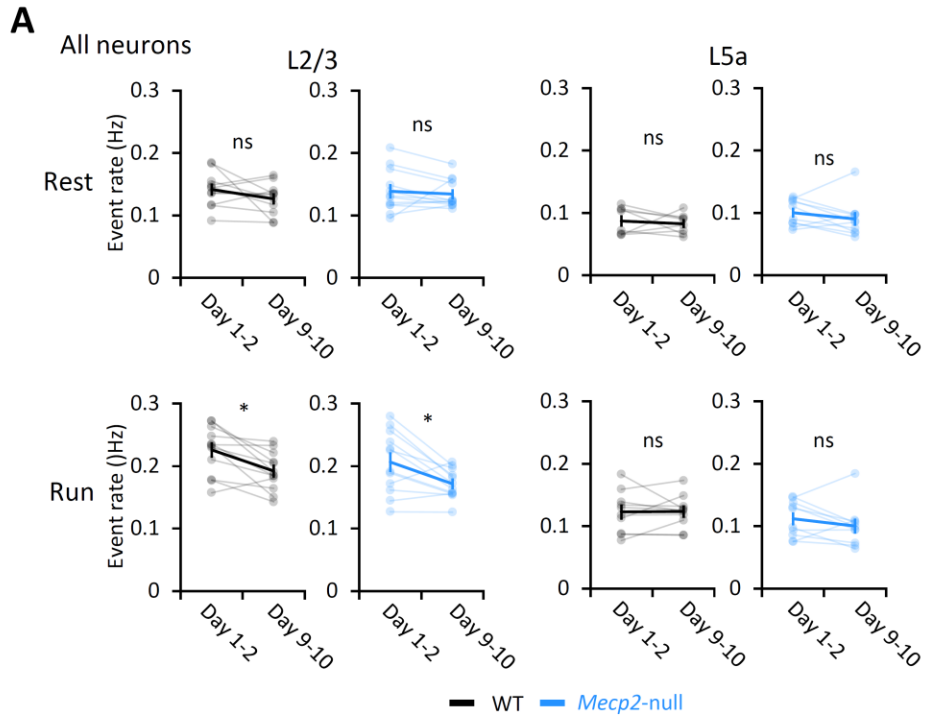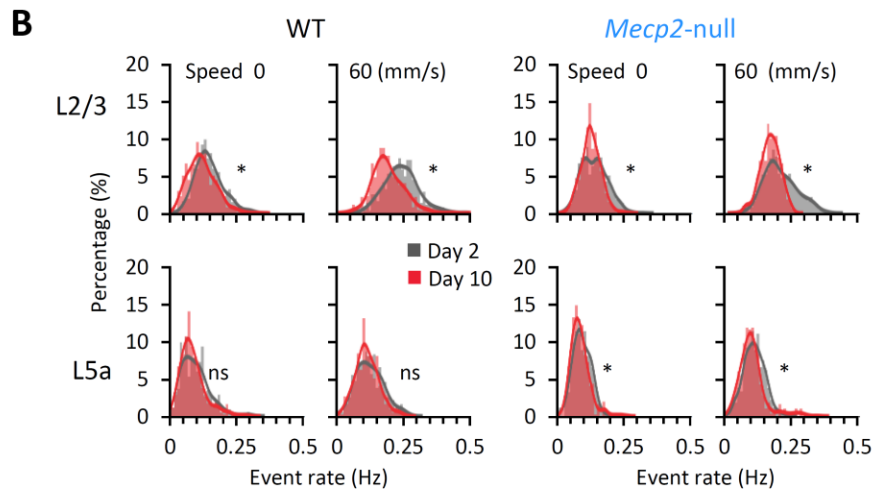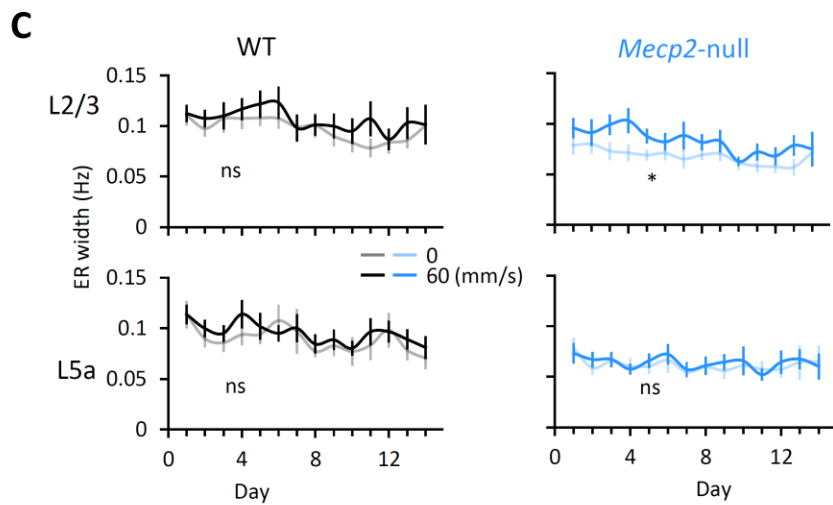

**Fig. S5. Evolution of event rates over the course of learning.** (A) Mean event rates of neurons in L2/3 and L5a during rest and running at 60 mm/sec block. Light lines connect data from an individual mouse. Dark lines connect the averaged data from all mice. L2/3 WT: n=11 mice; L2/3 *Mecp2*-null, n=12 mice. L5a WT: n=8 mice; L5a *Mecp2*-null, n=10 mice. Error bars represent mean  $\pm$  SE. ns, not significant, \*  $P < 0.05$ , Wilcoxon signed-rank test. (B) Distribution of neuronal event rates of all mice on days 2 and 10. Motor learning narrows the distribution and lowers the rates over time. \*  $P < 0.0001$ , Kolmogorov–Smirnov test. (C) The width of the event rate (ER) distribution in B, calculated as full width at half maximum of the amplitude of the distribution curve. L2/3 WT: n=13; L2/3 *Mecp2*-null: n=14; L5a WT: n=11; L5a *Mecp2*-null: n=13. \*  $P < 0.05$ , \*\*  $P < 0.01$ , RM-ANOVA test.



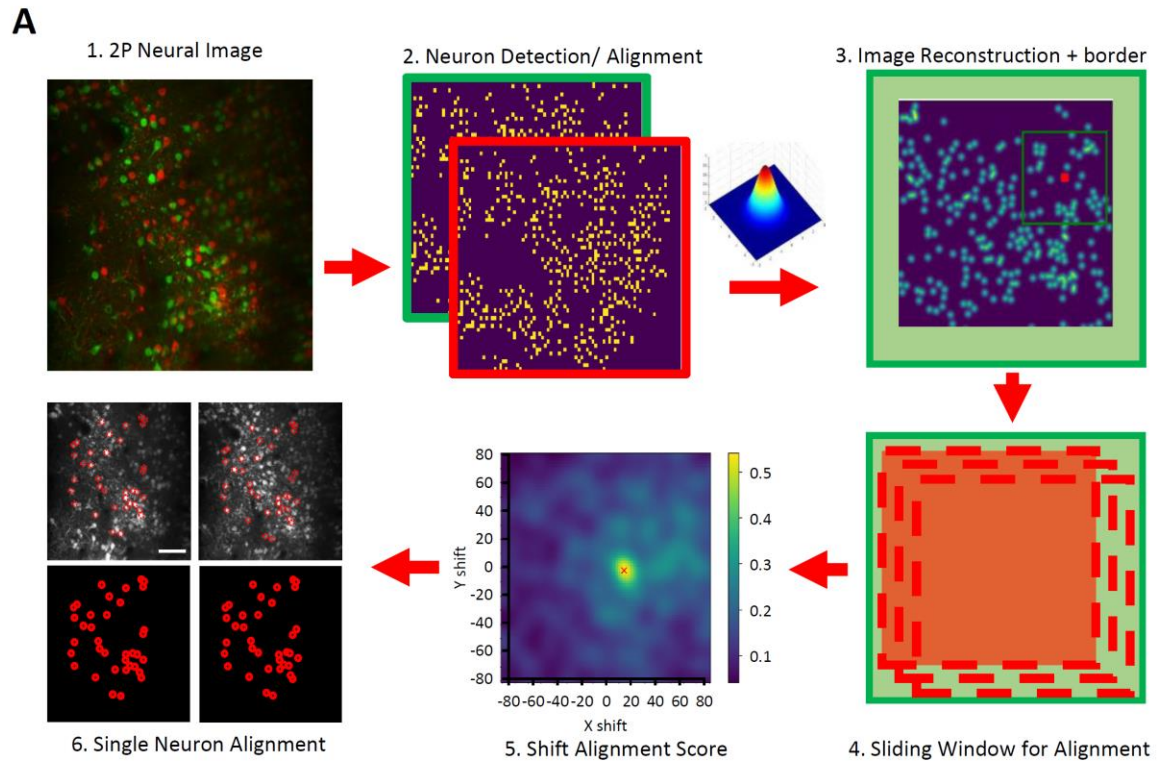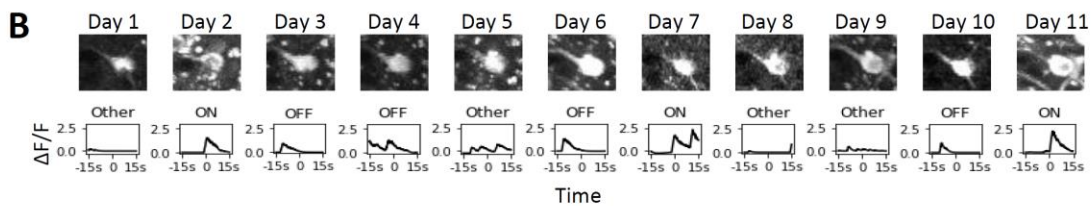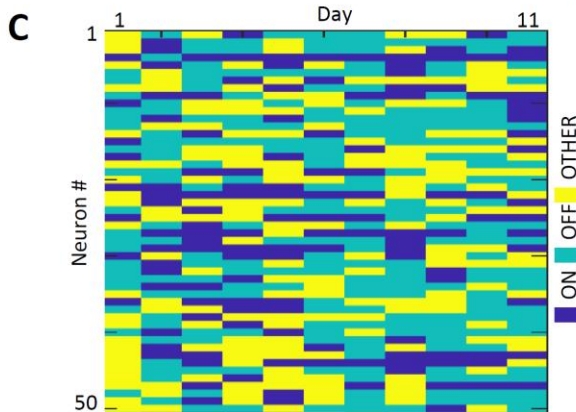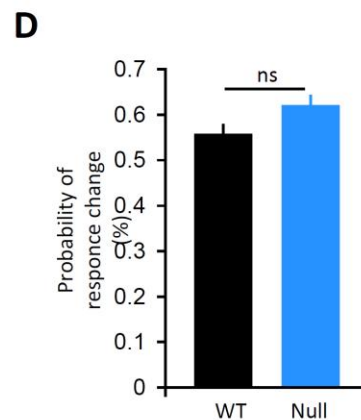

**Fig. S6. Behavior of one neuron over eleven days.** (A) Schematic of Global Alignment method (see Methods). About 20% of neurons can be followed over 12 days. (B) A representative neuron that showed different responses to the transition from rest to 15 mm/s (bottom row) over 11 different days. (C) The responses of 50 individual neurons to a transition from rest to 15 mm/s on each day over 11 days. (D) Probability of response type changes between two adjacent days in WT and *Mecp2*-null mice. WT, n=7 mice; *Mecp2*-null, n=5 mice. ns, not significant, Two-tailed t-test.



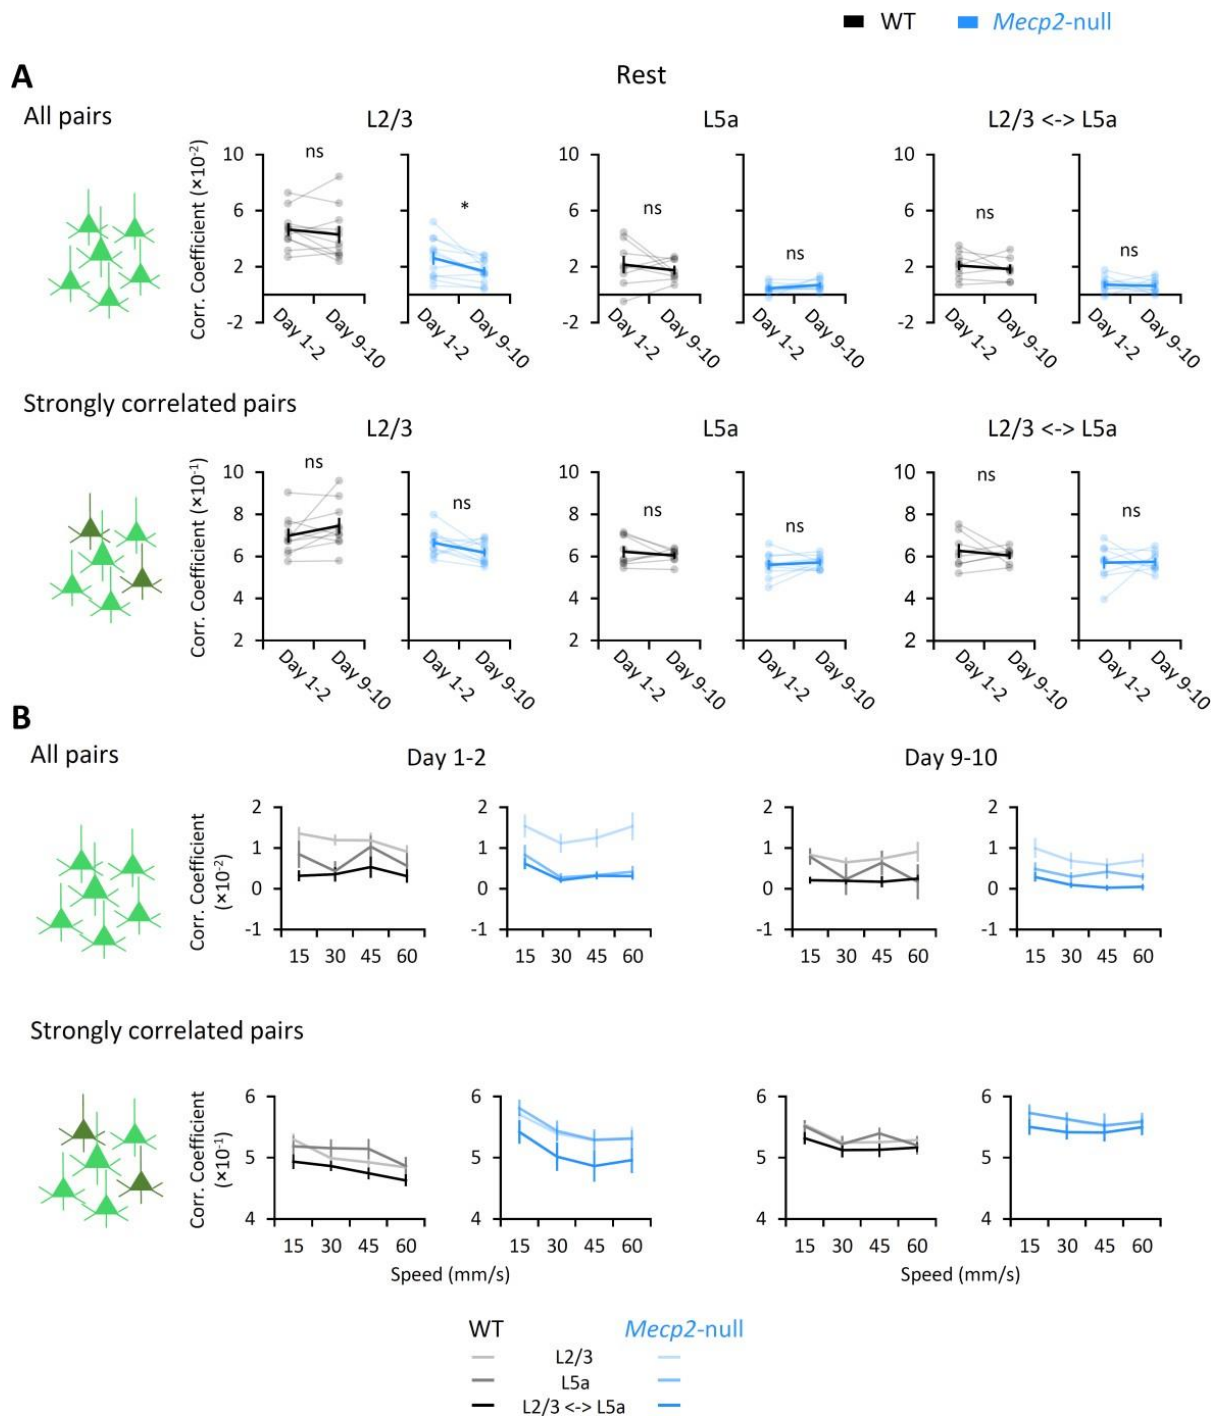

**Fig. S7. Evolution of functional connectivity at rest and running.** (A) Mean Pearson correlation coefficient (PCC) between pairs of neurons within L2/3, within L5a, and across both layers during rest (top: all pairs of correlation; bottom: strongly correlated pairs, defined by a PCC > twice the standard deviation). Light lines connect data from an individual mouse; dark lines show the average from all mice. L2/3 WT, n=11 mice; L2/3 *Mecp2*-null, n=12 mice; L5a WT, n=8 mice; L5a *Mecp2*-null, n=10 mice. Across both layers, WT, n=8 mice; *Mecp2*-null, n=10 mice. Error bars represent mean  $\pm$  SE. \*  $P < 0.05$ , Wilcoxon signed-rank test. (B) Average PCC at each speed from all the mice of each group (top: all pairs; bottom: strongly correlated pairs).

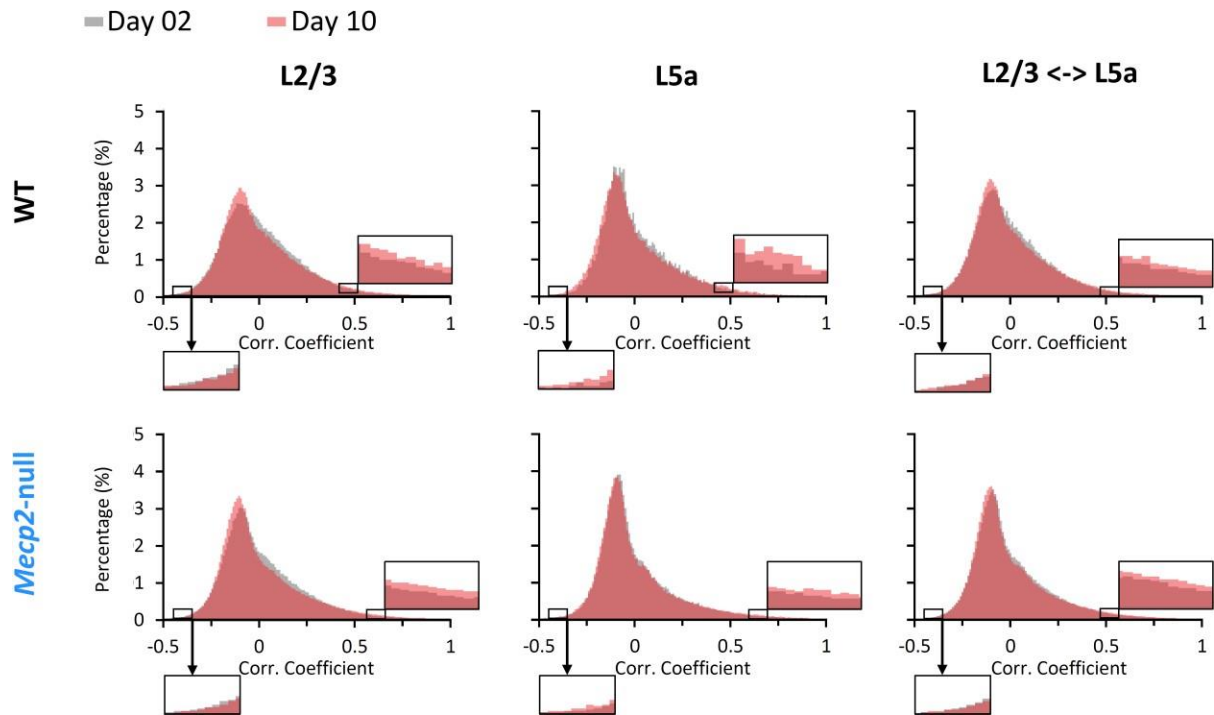

**Fig. S8. The distributions of Pearson's correlation coefficients of functional neuronal pairs are very wide, reflecting the dynamism of M1. L2/3 WT, n=11 mice; L2/3 *Mecp2*-null, n=12 mice; L5a WT, n=8 mice; L5a *Mecp2*-null, n=10 mice (we excluded L5a data from mice from whom we detected fewer than 20 neurons in L5a). Across both layers, WT, n=8 mice; *Mecp2*-null, n=10 mice.**

**A** Naïve mice, recorded during free movement

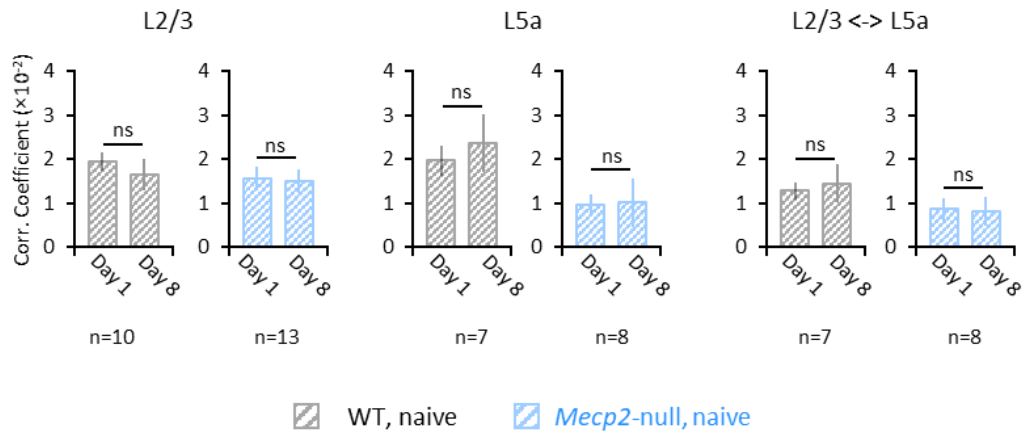

**B** Trained mice, recorded on wheel

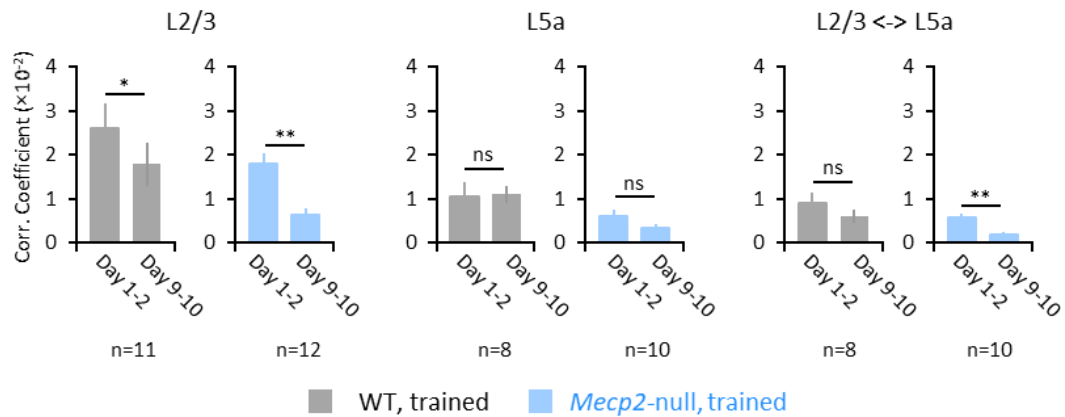

**Fig. S9. Circuit dynamics in naïve mice during free-running did not change over the course of a week, but the circuit in trained mice did.** (A) Comparison of averaged correlation coefficients during free-run mode between days 1 and 8 in naïve WT and *Mecp2*-null mice. There is no difference between days. (B) Comparison of averaged correlation coefficients during free-run mode between days 1-2 and 9-10 in trained WT and *Mecp2*-null mice. This indicates that the changes we observe in the M1 circuit over the course of learning do not just correlate with the behavioral improvements, but have a causal relationship to those improvements. Error bars represent mean ± SE. ns, not significant; \*  $P < 0.05$ , \*\*  $P < 0.01$ , Wilcoxon signed-rank test.

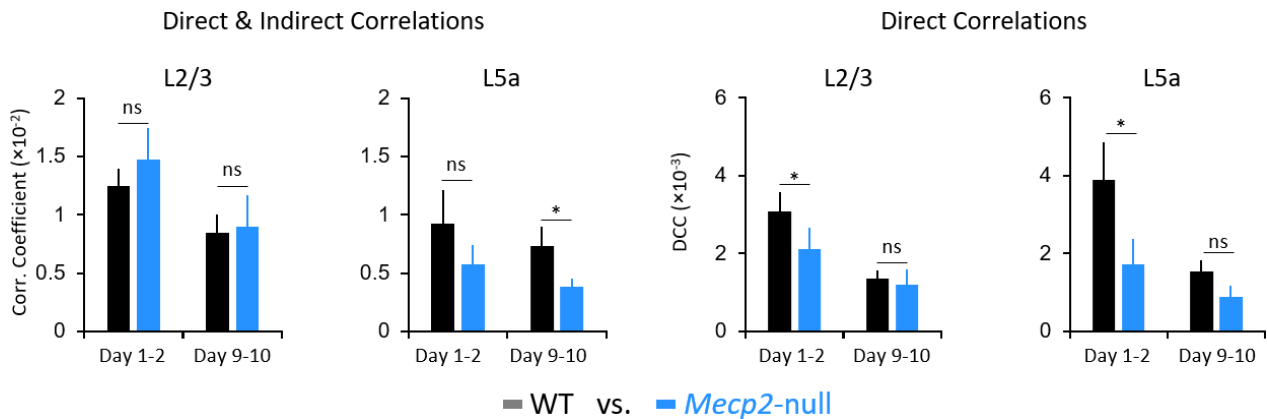

**Fig. S10. Cross-group comparison of Pearson's correlation coefficient.** Comparison of averaged correlation coefficients between WT and *Mecp2*-null mice during days 1-2 (learning) and days 9-10 (consolidation). The same data set was used as in **Fig 3**. L2/3 WT, n=11 mice; L2/3 *Mecp2*-null, n=12 mice; L5a WT, n=8 mice; L5a *Mecp2*-null, n=10 mice. Error bars represent mean  $\pm$  SE. ns, not significant; \*  $P < 0.05$ , Mann-Whitney U Test.

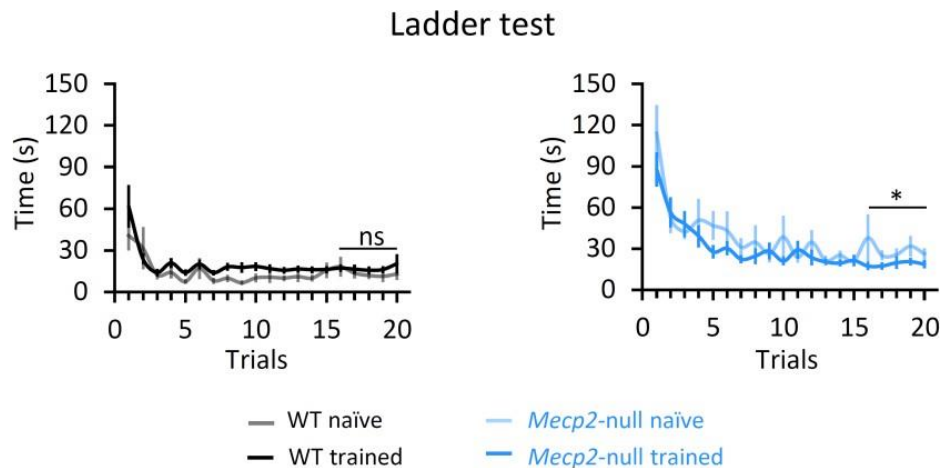

**Fig. S11. Wheel-speed-training improved the performance of *Mecp2* null mice on the ladder test.** Graphs show the duration of time wild-type and null mice needed to cross the ladder from one end to the other over the course of 20 trials. The less time spent on the ladder, the better the mouse's performance. Naïve: WT: n=15 mice; *Mecp2*-null, n=17 mice; Trained: WT: n=19 mice; *Mecp2*-null, n=17 mice. Error bars represent mean  $\pm$  SE. ns, not significant, \*  $P < 0.05$ , RM-ANOVA test.

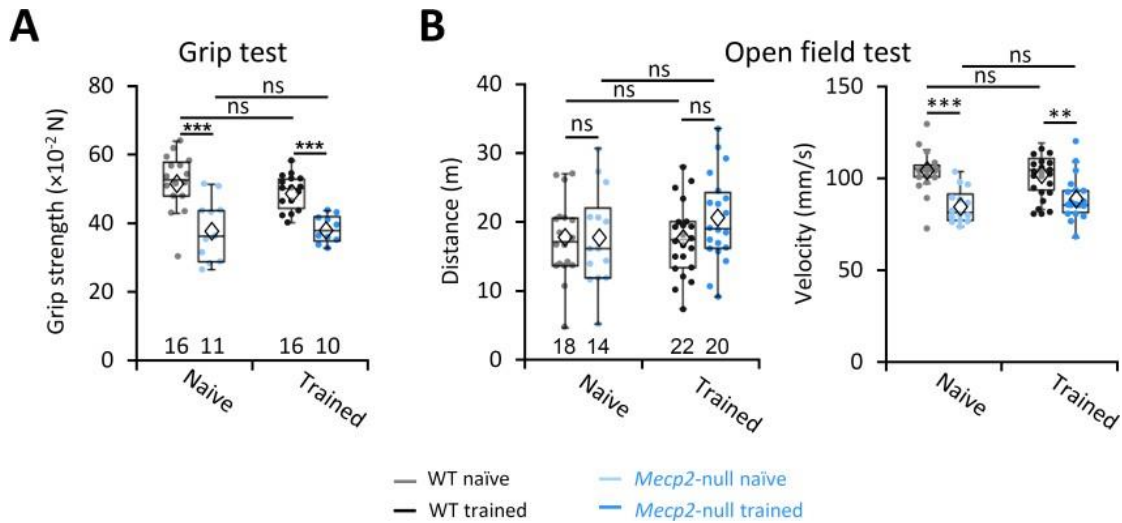

**Fig. S12. Motor training did not improve strength on the grip test or change parameters of physical performance on the open field test.** (A) Summary of the grip strength of front limbs. Naive: WT:  $n=16$  mice; *Mecp2*-null,  $n=11$  mice; Trained: WT:  $n=16$  mice; *Mecp2*-null,  $n=10$  mice. Error bars represent mean  $\pm$  SE. ns, not significant, \*  $P < 0.05$ , \*\*  $P < 0.01$ , \*\*\*  $P < 0.001$ , Two-way ANOVA test with Sidak's Post-Hoc. Diamond symbol represents the mean value. (B) Distance traveled in the open field test was not affected by genotype; the null mice were slower than WT in moving around, regardless of training. The number of animals in each group is indicated beneath each bar. Naive: WT:  $n=18$  mice; *Mecp2*-null,  $n=14$  mice; Trained: WT:  $n=22$  mice; *Mecp2*-null,  $n=20$  mice. Error bars represent mean  $\pm$  SE. ns, not significant, \*\*  $P < 0.01$ , \*\*\*  $P < 0.001$ , Two-way ANOVA test with Sidak's Post-Hoc.

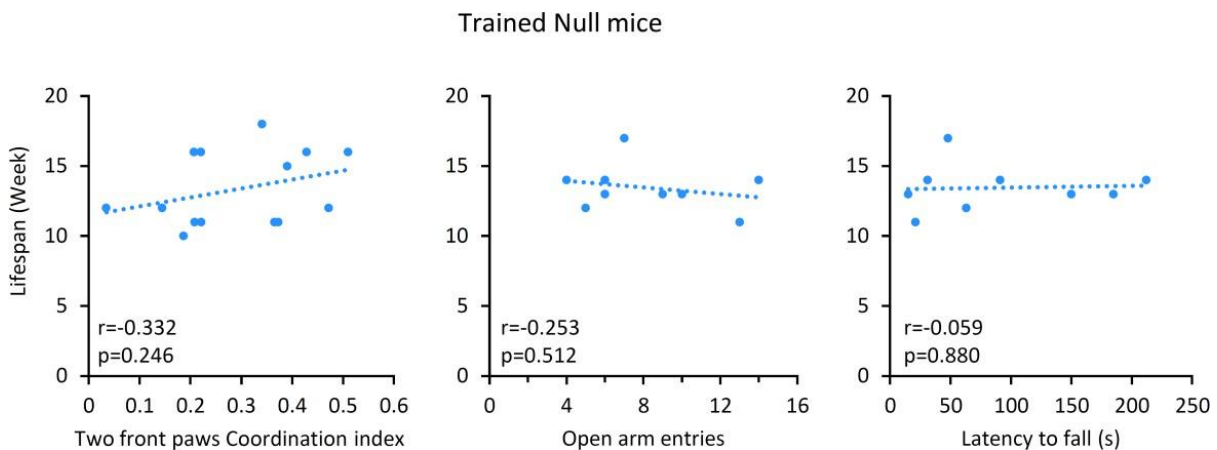

**Fig. S13. Longer lifespan correlates with motor learning, but not with reduced anxiety-like behavior or stamina on the rotarod.** Although the correlation between the lifespan and improved forepaw coordination is weak ( $p = 0.236$  and  $r = 0.336$ , Pearson bivariate correlations test), it suggests that motor learning contributes to extending the survival of *Mecp2*-null mice.

**Supplemental table 1: Detailed statistical results for each experiment, organized by figure panel.**

|                           | Figure Panel        | Test type                       | Sample size (mouse) | Group-wise comparison           | Test stat. | DF            | P-value | Asterisk |
|---------------------------|---------------------|---------------------------------|---------------------|---------------------------------|------------|---------------|---------|----------|
| Stride number             | Fig. 1D             | RM-ANOVA test; Sidak's Post-Hoc | WT: 15;<br>Null: 16 | WT vs. Null                     | F = 59.8   | dfn=1, dfd=29 | 0.000   | ***      |
|                           |                     |                                 |                     | Speed 15: WT vs. Null           |            |               | 0.000   | ***      |
|                           |                     |                                 |                     | Speed 30: WT vs. Null           |            |               | 0.000   | ***      |
|                           |                     |                                 |                     | Speed 45: WT vs. Null           |            |               | 0.000   | ***      |
|                           |                     |                                 |                     | Speed 60: WT vs. Null           |            |               | 0.000   | ***      |
| Stride number             | Fig. 1E left panel  | RM-ANOVA test                   | WT: 15;<br>Null: 16 | WT vs. Null                     | F = 69.4   | dfn=1, dfd=29 | 0.000   | ***      |
|                           | Fig. 1E right panel | Wilcoxon signed-rank test       | WT: 15              | Day 2 vs. Day 10                | Z = -3.124 |               | 0.002   | **       |
|                           |                     | Wilcoxon signed-rank test       | Null: 16            | Day 2 vs. Day 10                | Z = -1.656 |               | 0.098   | ns       |
| Stride length             | Fig. 1F left panel  | RM-ANOVA test                   | WT: 15;<br>Null: 16 | WT vs. Null                     | F = 0.008  | dfn=1, dfd=29 | 0.928   | ns       |
|                           | Fig. 1F right panel | Wilcoxon signed-rank test       | WT: 15              | Day 2 vs. Day 10                | Z = 2.215  |               | 0.027   | *        |
|                           |                     | Wilcoxon signed-rank test       | Null: 16            | Day 2 vs. Day 10                | F = 2.372  |               | 0.020   | *        |
| Paw coordination          | Fig. 1H left panel  | RM-ANOVA test                   | WT: 15;<br>Null: 16 | Coordination index: WT vs. Null | F = 6.546  | dfn=1, dfd=29 | 0.016   | *        |
|                           | Fig. 1H right panel | Wilcoxon signed-rank test       | WT: 15              | Day 2 vs. Day 10                | Z = 2.556  |               | 0.011   | *        |
|                           |                     | Wilcoxon signed-rank test       | Null: 16            | Day 2 vs. Day 10                | F = 3.361  |               | 0.001   | ***      |
| Event rate of each speeds | Fig. 2C             | RM-ANOVA test; Sidak's Post-Hoc | WT: 13;<br>Null: 14 | L2/3: WT vs. Null               | F = 6.4    | dfn=1, dfd=25 | 0.018   | *        |
|                           |                     |                                 |                     | L2/3 Speed 0: WT vs. Null       |            |               | 0.281   | ns       |
|                           |                     |                                 |                     | L2/3 Speed 15: WT vs. Null      |            |               | 0.005   | **       |
|                           |                     |                                 |                     | L2/3 Speed 30: WT vs. Null      |            |               | 0.001   | **       |



|                                 |         |                             |                     |                                                  |              |                  |       |    |
|---------------------------------|---------|-----------------------------|---------------------|--------------------------------------------------|--------------|------------------|-------|----|
|                                 |         |                             |                     | L2/3 Speed<br>45: WT vs.<br>Null                 |              |                  | 0.004 | ** |
|                                 |         |                             |                     | L2/3 Speed<br>60: WT vs.<br>Null                 |              |                  | 0.001 | ** |
|                                 |         |                             | WT: 11;<br>Null: 13 | L5a: WT vs.<br>Null                              | F = 3.7      | dfn=1,<br>dfd=22 | 0.065 | ns |
|                                 |         |                             |                     | L5a Speed 0:<br>WT vs. Null                      |              |                  | 0.656 | ns |
|                                 |         |                             |                     | L5a Speed<br>15: WT vs.<br>Null                  |              |                  | 0.069 | ns |
|                                 |         |                             |                     | L5a Speed<br>30: WT vs.<br>Null                  |              |                  | 0.045 | *  |
|                                 |         |                             |                     | L5a Speed<br>45: WT vs.<br>Null                  |              |                  | 0.019 | *  |
|                                 |         |                             |                     | L5a Speed<br>60: WT vs.<br>Null                  |              |                  | 0.016 | *  |
| Event rate of<br>each day       | Fig. 2D | RM-ANOVA<br>test            | WT: 13;<br>Null: 14 | L2/3 Speed<br>0: WT vs.<br>Null                  | F =<br>0.008 | dfn=1,<br>dfd=25 | 0.931 | ns |
|                                 |         | RM-ANOVA<br>test            | WT: 13;<br>Null: 14 | L2/3 Speed<br>30: WT vs.<br>Null                 | F =<br>9.168 | dfn=1,<br>dfd=25 | 0.006 | ** |
|                                 |         | RM-ANOVA<br>test            | WT: 13;<br>Null: 14 | L2/3 Speed<br>60: WT vs.<br>Null                 | F =<br>9.521 | dfn=1,<br>dfd=25 | 0.005 | ** |
|                                 |         | RM-ANOVA<br>test            | WT: 11;<br>Null: 13 | L5a Speed 0:<br>WT vs. Null                      | F =<br>1.056 | dfn=1,<br>dfd=22 | 0.315 | ns |
|                                 |         | RM-ANOVA<br>test            | WT: 11;<br>Null: 13 | L5a Speed<br>30: WT vs.<br>Null                  | F =<br>4.301 | dfn=1,<br>dfd=22 | 0.050 | *  |
|                                 |         | RM-ANOVA<br>test            | WT: 11;<br>Null: 13 | L5a Speed<br>60: WT vs.<br>Null                  | F =<br>5.350 | dfn=1,<br>dfd=22 | 0.030 | *  |
| Response to<br>speed<br>changes | Fig. 2E | Kolmogorov–<br>Smirnov test | 11                  | L2/3 WT<br>Speed<br>0->15: Day<br>2 vs. Day 10   |              |                  | 0.000 | *  |
|                                 |         | Kolmogorov–<br>Smirnov test | 11                  | L2/3 WT<br>Speed<br>45->60: Day<br>2 vs. Day 10  |              |                  | 0.015 | ns |
|                                 |         | Kolmogorov–<br>Smirnov test | 12                  | L2/3 Null<br>Speed<br>0->15: Day<br>2 vs. Day 10 |              |                  | 0.000 | *  |
|                                 |         | Kolmogorov–<br>Smirnov test | 12                  | L2/3 Null<br>Speed<br>45->60:                    |              |                  | 0.000 | *  |

|                                                                |         |                                 |                      |                                                               |              |                  |       |    |
|----------------------------------------------------------------|---------|---------------------------------|----------------------|---------------------------------------------------------------|--------------|------------------|-------|----|
|                                                                |         |                                 |                      | Day 2 vs.<br>Day 10                                           |              |                  |       |    |
|                                                                |         | Kolmogorov–<br>Smirnov test     | 8                    | L5a WT<br>Speed<br>0->15: Day<br>2 vs. Day 10                 |              |                  | 0.000 | *  |
|                                                                |         | Kolmogorov–<br>Smirnov test     | 8                    | L5a WT<br>Speed<br>45->60: Day<br>2 vs. Day 10                |              |                  | 0.000 | *  |
|                                                                |         | Kolmogorov–<br>Smirnov test     | 10                   | L5a Null<br>Speed<br>0->15: Day<br>2 vs. Day 10               |              |                  | 0.148 | ns |
|                                                                |         | Kolmogorov–<br>Smirnov test     | 10                   | L5a Null<br>Speed<br>45->60:<br>Day 2 vs.<br>Day 10           |              |                  | 0.000 | *  |
| Event rate<br>during 10s<br>after<br>transition to<br>Speed 60 | Fig. 2F | RM-ANOVA<br>test                | WT: 11;<br>Null: 12; | L2/3: WT<br>vs. Null                                          | F =<br>8.946 | dfn=1,<br>dfd=21 | 0.007 | ** |
|                                                                |         | RM-ANOVA<br>test                | WT: 8;<br>Null: 10   | L5a: WT vs.<br>Null                                           | F =<br>1.223 | dfn=1,<br>dfd=16 | 0.284 | ns |
| Direct &<br>Indirect<br>Correlations                           | Fig. 3A | Wilcoxon<br>signed-rank<br>test | 11                   | All pairs<br>L2/3 WT:<br>Day 1-2 vs.<br>Day 9-10              | Z = -2.3     |                  | 0.021 | *  |
|                                                                |         | Wilcoxon<br>signed-rank<br>test | 12                   | All pairs<br>L2/3 Null:<br>Day 1-2 vs.<br>Day 9-10            | Z = -2.3     |                  | 0.023 | *  |
|                                                                |         | Wilcoxon<br>signed-rank<br>test | 8                    | All pairs L5a<br>WT: Day 1-<br>2 vs. Day 9-<br>10             | Z = -0.8     |                  | 0.401 | ns |
|                                                                |         | Wilcoxon<br>signed-rank<br>test | 10                   | All pairs L5a<br>Null: Day 1-<br>2 vs. Day 9-<br>10           | Z = -1.2     |                  | 0.241 | ns |
|                                                                |         | Wilcoxon<br>signed-rank<br>test | 8                    | All pairs<br>L2/3<->L5a<br>WT: Day 1-<br>2 vs. Day 9-<br>10   | Z = -2.2     |                  | 0.025 | *  |
|                                                                |         | Wilcoxon<br>signed-rank<br>test | 10                   | All pairs<br>L2/3<->L5a<br>Null: Day 1-<br>2 vs. Day 9-<br>10 | Z = -2.7     |                  | 0.007 | ** |
|                                                                |         | Wilcoxon<br>signed-rank<br>test | 11                   | Strongly<br>correlated<br>pairs L2/3<br>WT: Day 1-            | Z = -2.7     |                  | 0.008 | ** |

|                     |         |                           |    |                                                                    |          |  |       |    |
|---------------------|---------|---------------------------|----|--------------------------------------------------------------------|----------|--|-------|----|
|                     |         |                           |    | 2 vs. Day 9-10                                                     |          |  |       |    |
|                     |         | Wilcoxon signed-rank test | 12 | Strongly correlated pairs L2/3<br>Null: Day 1-2 vs. Day 9-10       | Z = -2.8 |  | 0.005 | ** |
|                     |         | Wilcoxon signed-rank test | 8  | Strongly correlated pairs L5a<br>WT: Day 1-2 vs. Day 9-10          | Z = -2.1 |  | 0.036 | *  |
|                     |         | Wilcoxon signed-rank test | 10 | Strongly correlated pairs L5a<br>Null: Day 1-2 vs. Day 9-10        | Z = -2.8 |  | 0.005 | ** |
|                     |         | Wilcoxon signed-rank test | 8  | Strongly correlated pairs L2/3<->L5a<br>WT: Day 1-2 vs. Day 9-10   | Z = -2.5 |  | 0.012 | *  |
|                     |         | Wilcoxon signed-rank test | 10 | Strongly correlated pairs L2/3<->L5a<br>Null: Day 1-2 vs. Day 9-10 | Z = -2.8 |  | 0.005 | ** |
| Direct Correlations | Fig. 3B | Wilcoxon signed-rank test | 11 | All pairs L2/3 WT:<br>Day 1-2 vs. Day 9-10                         | Z = -2.8 |  | 0.006 | ** |
|                     |         | Wilcoxon signed-rank test | 12 | All pairs L2/3 Null:<br>Day 1-2 vs. Day 9-10                       | Z = -3.1 |  | 0.002 | ** |
|                     |         | Wilcoxon signed-rank test | 8  | All pairs L5a<br>WT: Day 1-2 vs. Day 9-10                          | Z = -2.2 |  | 0.025 | *  |
|                     |         | Wilcoxon signed-rank test | 10 | All pairs L5a<br>Null: Day 1-2 vs. Day 9-10                        | Z = -1.4 |  | 0.169 | ns |
|                     |         | Wilcoxon signed-rank test | 8  | All pairs L2/3<->L5a<br>WT: Day 1-2 vs. Day 9-10                   | Z = -2.5 |  | 0.012 | *  |

|                                           |         |                           |                     |                                                                    |           |                  |       |    |
|-------------------------------------------|---------|---------------------------|---------------------|--------------------------------------------------------------------|-----------|------------------|-------|----|
|                                           |         | Wilcoxon signed-rank test | 10                  | All pairs L2/3<->L5a<br>Null: Day 1-2 vs. Day 9-10                 | Z = -2.7  |                  | 0.007 | ** |
|                                           |         | Wilcoxon signed-rank test | 11                  | Strongly correlated pairs L2/3<br>WT: Day 1-2 vs. Day 9-10         | Z = -2.8  |                  | 0.004 | ** |
|                                           |         | Wilcoxon signed-rank test | 12                  | Strongly correlated pairs L2/3<br>Null: Day 1-2 vs. Day 9-10       | Z = -2.4  |                  | 0.019 | *  |
|                                           |         | Wilcoxon signed-rank test | 8                   | Strongly correlated pairs L5a<br>WT: Day 1-2 vs. Day 9-10          | Z = -2.4  |                  | 0.017 | *  |
|                                           |         | Wilcoxon signed-rank test | 10                  | Strongly correlated pairs L5a<br>Null: Day 1-2 vs. Day 9-10        | Z = -0.6  |                  | 0.508 | ns |
|                                           |         | Wilcoxon signed-rank test | 8                   | Strongly correlated pairs L2/3<->L5a<br>WT: Day 1-2 vs. Day 9-10   | Z = -2.2  |                  | 0.025 | *  |
|                                           |         | Wilcoxon signed-rank test | 10                  | Strongly correlated pairs L2/3<->L5a<br>Null: Day 1-2 vs. Day 9-10 | Z = -2.3  |                  | 0.022 | *  |
| Cross-layer Correlations                  | Fig. 3C | RM-ANOVA test             | WT: 8;<br>Null: 10  | WT vs. Null                                                        | F = 6.932 | dfn=1,<br>dfd=16 | 0.018 | *  |
| Fraction of directly-correlated pairs (%) | Fig. 4C | Student's t-test          | WT: 9;<br>Null: 9   | Rest: WT vs. Null                                                  | F = 0.758 | 16               | 0.035 | *  |
|                                           |         |                           |                     | Run: WT vs. Null                                                   | F = 3.067 | 16               | 0.031 | *  |
| DCC100 / DCC200                           | Fig. 4F | RM-ANOVA test             | WT: 11;<br>Null: 12 | L2/3: WT vs. Null                                                  | F = 7.133 | dfn=1,<br>dfd=21 | 0.014 | *  |
|                                           |         | RM-ANOVA test             | WT: 8;<br>Null: 10  | L5a: WT vs. Null                                                   | F = 6.911 | dfn=1,<br>dfd=16 | 0.018 | *  |

|                    |         |                                           |                                                                    |                                                          |            |               |       |     |
|--------------------|---------|-------------------------------------------|--------------------------------------------------------------------|----------------------------------------------------------|------------|---------------|-------|-----|
| Duration on ladder | Fig. 5B | RM-ANOVA test                             | WT: 15;<br>Null: 17                                                | Naive: WT vs. Null                                       | F = 12.880 | dfn=1, dfd=30 | 0.001 | *** |
|                    |         | RM-ANOVA test                             | WT: 19;<br>Null: 17                                                | Trained: WT vs. Null                                     | F = 0.579  | dfn=1, dfd=34 | 0.452 | ns  |
| Short steps        | Fig. 5C | RM-ANOVA test                             | Naive: 17;<br>Training: 17;                                        | Short Step: Naive vs. Trained                            | F = 9.463  | dfn=1, dfd=32 | 0.004 | **  |
| Irregular steps    |         | RM-ANOVA test                             | Naive: 17;<br>Training: 17;                                        | Irregular Step: Naive vs. Trained                        | F = 21.901 | dfn=1, dfd=32 | 0.000 | *** |
| Duration on ladder | Fig. 5D | One-way ANOVA test; Fisher's LSD post hoc | Naive: 17;<br>2 day after training: 11;<br>4 day after training: 6 | Between Groups                                           | F = 3.4    | 33            | 0.048 | *   |
|                    |         |                                           |                                                                    | Duration Naive vs. 2 day after training                  |            |               | 0.041 | *   |
|                    |         |                                           |                                                                    | Duration Naive vs. 4 day after training                  |            |               | 0.045 | *   |
|                    |         |                                           |                                                                    | Duration 2 day after training vs. 4 day after training   |            |               | 0.744 | ns  |
| Short steps        |         | One-way ANOVA test; Fisher's LSD post hoc | Naive: 17;<br>2 day after training: 11;<br>4 day after training: 6 | Between Groups                                           | F = 4.2    | 33            | 0.025 | *   |
|                    |         |                                           |                                                                    | Short Step Naive vs. 2 day after training                |            |               | 0.019 | *   |
|                    |         |                                           |                                                                    | Short Step Naive vs. 4 day after training                |            |               | 0.034 | *   |
|                    |         |                                           |                                                                    | Short Step 2 day after training vs. 4 day after training |            |               | 0.854 | ns  |
| Irregular steps    |         | One-way ANOVA test; Fisher's LSD post hoc | Naive: 17;<br>2 day after training: 11;<br>4 day after training: 6 | Between Groups                                           | F = 15.18  | 33            | 0.000 | *** |
|                    |         |                                           |                                                                    | Irregular Step Naive vs. 2 day after training            |            |               | 0.000 | *** |
|                    |         |                                           |                                                                    | Irregular Naive vs. 4 day after training                 |            |               | 0.001 | *** |
|                    |         |                                           |                                                                    | Irregular 2 day after training vs. 4                     |            |               | 0.583 | ns  |

|                                           |         |                                      |                                                                | day after training                        |            |               |       |     |
|-------------------------------------------|---------|--------------------------------------|----------------------------------------------------------------|-------------------------------------------|------------|---------------|-------|-----|
| Latency to fall, trial 1 (in seconds)     | Fig. 5E | Two-way ANOVA test; Sidak's Post-Hoc | WT Naïve: 13; WT Trained: 13; Null Naïve: 9; Null Trained: 10  | WT vs. Null                               | F = 92.477 | dfn=1, dfd=41 | 0.000 | *** |
|                                           |         |                                      |                                                                | Naïve: WT vs. Null                        |            |               | 0.000 | *** |
|                                           |         |                                      |                                                                | Trained: WT vs. Null                      |            |               | 0.000 | *** |
|                                           |         |                                      |                                                                | Naive vs. Trained                         | F = 8.387  | dfn=1, dfd=41 | 0.006 | **  |
|                                           |         |                                      |                                                                | WT: Naive vs. Trained                     |            |               | 0.041 | *   |
|                                           |         |                                      |                                                                | Null: Naive vs. Trained                   |            |               | 0.050 | *   |
| Latency to stop locomoting (in seconds)   | Fig. 5F | RM-ANOVA test                        | WT Naïve: 11; WT Training: 9;                                  | WT: Naive vs. Trained                     | F = 5.335  | dfn=1, dfd=18 | 0.033 | *   |
|                                           |         |                                      | Null Naïve: 7; Null Training: 8                                | Null: Naive vs. Trained                   | F = 8.212  | dfn=1, dfd=13 | 0.013 | *   |
|                                           |         |                                      | WT Naïve: 11; Null Naïve: 7                                    | Naive: WT vs. Null                        | F = 72.906 | dfn=1, dfd=16 | 0.000 | *** |
|                                           |         |                                      | WT Training: 9; Null Training: 8                               | Trained: WT vs. Null                      | F = 88.963 | dfn=1, dfd=15 | 0.000 | *** |
| Fold-change of latency to stop locomoting |         | RM-ANOVA test                        | Fold of change: WT: 9; Null: 8                                 | WT vs. Null                               | F = 9.369  | dfn=1, dfd=15 | 0.008 | **  |
| Open field test duration in center (%)    | Fig. 6A | Two-way ANOVA test; Sidak's Post-Hoc | WT Naïve: 18; WT Trained: 22; Null Naïve: 14; Null Trained: 20 | Duration in center: WT vs. Null           | F = 1.693  | dfn=1, dfd=70 | 0.197 | ns  |
|                                           |         |                                      |                                                                | Duration in center: Naïve; WT vs. Null    |            |               | 0.043 | *   |
|                                           |         |                                      |                                                                | Duration in center: Trained; WT vs. Null  |            |               | 0.696 | ns  |
|                                           |         |                                      |                                                                | Duration in center: Naive vs. Trained     | F = 5.008  | dfn=1, dfd=70 | 0.028 | *   |
|                                           |         |                                      |                                                                | Duration in center: WT; Naïve vs. Trained |            |               | 0.755 | ns  |
|                                           |         |                                      |                                                                | Duration in center: Null;                 |            |               | 0.008 | **  |



|                                                   |         |                                      |                                                                |                                                |           |               |       |     |
|---------------------------------------------------|---------|--------------------------------------|----------------------------------------------------------------|------------------------------------------------|-----------|---------------|-------|-----|
|                                                   |         |                                      |                                                                | Naïve vs. Trained                              |           |               |       |     |
| Open field test center entries                    |         | Two-way ANOVA test; Sidak's Post-Hoc | WT Naïve: 18; WT Trained: 22; Null Naïve: 14; Null Trained: 20 | Center entries: WT vs. Null                    | F = 6.268 | dfn=1, dfd=70 | 0.015 | *   |
|                                                   |         |                                      |                                                                | Center entries: Naïve; WT vs. Null             |           |               | 0.004 | **  |
|                                                   |         |                                      |                                                                | Center entries: Trained; WT vs. Null           |           |               | 0.694 | ns  |
|                                                   |         |                                      |                                                                | Center entries: Naïve vs. Trained              | F = 4.006 | dfn=1, dfd=70 | 0.049 | *   |
|                                                   |         |                                      |                                                                | Center entries: WT; Naïve vs. Trained          |           |               | 0.991 | ns  |
|                                                   |         |                                      |                                                                | Center entries: Null; Naïve vs. Trained        |           |               | 0.009 | **  |
|                                                   |         |                                      |                                                                |                                                |           |               |       |     |
| Elevated plus maze test duration in open arms (%) | Fig. 6B | Two-way ANOVA test; Sidak's Post-Hoc | WT Naïve: 12; WT Trained: 11; Null Naïve: 8; Null Trained: 16  | Duration in open arms: WT vs. Null             | F = 30.16 | dfn=1, dfd=43 | 0.000 | *** |
|                                                   |         |                                      |                                                                | Duration in open arms: Naïve: WT vs. Null      |           |               | 0.015 | *   |
|                                                   |         |                                      |                                                                | Duration in open arms: Trained: WT vs. Null    |           |               | 0.000 | *** |
|                                                   |         |                                      |                                                                | Duration in open arms: Naïve vs. Trained       | F = 2.403 | dfn=1, dfd=43 | 0.128 | ns  |
|                                                   |         |                                      |                                                                | Duration in open arms: WT: Naïve vs. Trained   |           |               | 0.951 | ns  |
|                                                   |         |                                      |                                                                | Duration in open arms: Null: Naïve vs. Trained |           |               | 0.032 | *   |
|                                                   |         |                                      |                                                                |                                                |           |               |       |     |
| Elevated plus maze test, ratio of entries in      |         | Two-way ANOVA; Sidak's Post-Hoc      | WT Naïve: 12; WT Trained: 11; Null Naïve: 8;                   | Entries ratio: WT vs. Null                     | F = 5.700 | dfn=1, dfd=43 | 0.021 | *   |
|                                                   |         |                                      |                                                                | Entries ratio: Naïve: WT vs. Null              |           |               | 0.516 | ns  |

|                                                                            |          |                           |                        |                                          |           |               |       |     |
|----------------------------------------------------------------------------|----------|---------------------------|------------------------|------------------------------------------|-----------|---------------|-------|-----|
| open over closed arms                                                      |          |                           | Null Trained: 16       | Entries ratio: Trained: WT vs. Null      |           |               | 0.006 | **  |
|                                                                            |          |                           |                        | Entries ratio: Naïve vs. Trained         | F = 5.157 | dfn=1, dfd=43 | 0.028 | *   |
|                                                                            |          |                           |                        | Entries ratio: WT: Naïve vs. Trained     |           |               | 0.531 | ns  |
|                                                                            |          |                           |                        | Entries ratio: Null: Naïve vs. Trained   |           |               | 0.015 | *   |
| Survival of Mecp2-null mice                                                | Fig. 6C  | Mann-Whitney U test       | Naïve: 25; Trained: 20 | Naïve vs. Trained                        | U = 382   |               | 0.002 | **  |
| degree of improvement in stride and coordination between week 1 and week 2 | Fig. S1C | Wilcoxon signed-rank test | 15                     | Stride number WT: Day 2 vs. Day 7        | Z = -2.3  |               | 0.020 | *   |
|                                                                            |          | Wilcoxon signed-rank test | 15                     | Stride number Null: Day 2 vs. Day 7      | Z = -3.2  |               | 0.001 | **  |
|                                                                            |          | Wilcoxon signed-rank test | 15                     | Stride number WT: Day 8 vs. Day 12       | Z = -1.2  |               | 0.222 | ns  |
|                                                                            |          | Wilcoxon signed-rank test | 12                     | Stride number Null: Day 8 vs. Day 12     | Z = 1.0   |               | 0.308 | ns  |
|                                                                            |          | Wilcoxon signed-rank test | 15                     | Stride length WT: Day 2 vs. Day 7        | Z = 1.5   |               | 0.125 | ns  |
|                                                                            |          | Wilcoxon signed-rank test | 15                     | Stride length Null: Day 2 vs. Day 7      | Z = 2.0   |               | 0.044 | *   |
|                                                                            |          | Wilcoxon signed-rank test | 15                     | Stride length WT: Day 8 vs. Day 12       | Z = 0.1   |               | 0.865 | ns  |
|                                                                            |          | Wilcoxon signed-rank test | 12                     | Stride length Null: Day 8 vs. Day 12     | Z = 1.1   |               | 0.272 | ns  |
|                                                                            |          | Wilcoxon signed-rank test | 15                     | Coordination index WT: Day 2 vs. Day 7   | Z = 1.9   |               | 0.053 | ns  |
|                                                                            |          | Wilcoxon signed-rank test | 16                     | Coordination index Null: Day 2 vs. Day 7 | Z = 3.5   |               | 0.000 | *** |
|                                                                            |          | Wilcoxon signed-rank test | 15                     | Coordination index WT: Day 8 vs. Day 12  | Z = -1.1  |               | 0.256 | ns  |

|            |          |                           |                                         |                                           |            |               |       |     |
|------------|----------|---------------------------|-----------------------------------------|-------------------------------------------|------------|---------------|-------|-----|
|            |          | Wilcoxon signed-rank test | 15                                      | Coordination index Null: Day 8 vs. Day 12 | Z = 1.8    |               | 0.078 | ns  |
| Soma size  | Fig. S2B | Rank sum test             | L2/3: 28125 neurons; L5a: 10395 neurons | L2/3 vs. L5a                              |            |               | 0.000 | *** |
| Event rate | Fig. S3  | RM-ANOVA test             | WT: 13; Null: 14                        | Increasing speed: Speed 0: WT vs. Null    | F = 0.008  | dfn=1, dfd=25 | 0.931 | ns  |
|            |          | RM-ANOVA test             | WT: 13; Null: 14                        | Increasing speed: Speed 15: WT vs. Null   | F = 5.179  | dfn=1, dfd=25 | 0.032 | *   |
|            |          | RM-ANOVA test             | WT: 13; Null: 14                        | Increasing speed: Speed 30: WT vs. Null   | F = 9.168  | dfn=1, dfd=25 | 0.006 | **  |
|            |          | RM-ANOVA test             | WT: 13; Null: 14                        | Increasing speed: Speed 45: WT vs. Null   | F = 6.164  | dfn=1, dfd=25 | 0.020 | *   |
|            |          | RM-ANOVA test             | WT: 13; Null: 14                        | Increasing speed: Speed 60: WT vs. Null   | F = 9.521  | dfn=1, dfd=25 | 0.005 | **  |
|            |          | RM-ANOVA test             | WT: 13; Null: 14                        | Decreasing speed: Speed 0: WT vs. Null    | F = 3.463  | dfn=1, dfd=25 | 0.075 | ns  |
|            |          | RM-ANOVA test             | WT: 13; Null: 14                        | Decreasing speed: Speed 15: WT vs. Null   | F = 7.326  | dfn=1, dfd=25 | 0.012 | *   |
|            |          | RM-ANOVA test             | WT: 13; Null: 14                        | Decreasing speed: Speed 30: WT vs. Null   | F = 12.312 | dfn=1, dfd=25 | 0.002 | **  |
|            |          | RM-ANOVA test             | WT: 13; Null: 14                        | Decreasing speed: Speed 45: WT vs. Null   | F = 12.936 | dfn=1, dfd=25 | 0.001 | **  |
|            |          | RM-ANOVA test             | WT: 13; Null: 14                        | Decreasing speed: Speed 60: WT vs. Null   | F = 11.211 | dfn=1, dfd=25 | 0.003 | **  |
| Event rate | Fig. S4  | RM-ANOVA test             | WT: 11; Null: 13                        | Increasing speed: Speed 0: WT vs. Null    | F = 1.056  | dfn=1, dfd=22 | 0.315 | ns  |
|            |          | RM-ANOVA test             | WT: 11; Null: 13                        | Increasing speed: Speed                   | F = 2.110  | dfn=1, dfd=22 | 0.160 | ns  |

|            |          |                           |                  |                                         |            |               |          |
|------------|----------|---------------------------|------------------|-----------------------------------------|------------|---------------|----------|
|            |          |                           |                  | 15: WT vs. Null                         |            |               |          |
|            |          | RM-ANOVA test             | WT: 11; Null: 13 | Increasing speed: Speed 30: WT vs. Null | F = 4.301  | dfn=1, dfd=22 | 0.050 *  |
|            |          | RM-ANOVA test             | WT: 11; Null: 13 | Increasing speed: Speed 45: WT vs. Null | F = 4.817  | dfn=1, dfd=22 | 0.039 *  |
|            |          | RM-ANOVA test             | WT: 11; Null: 13 | Increasing speed: Speed 60: WT vs. Null | F = 5.350  | dfn=1, dfd=22 | 0.030 *  |
|            |          | RM-ANOVA test             | WT: 11; Null: 13 | Decreasing speed: Speed 0: WT vs. Null  | F = 1.160  | dfn=1, dfd=22 | 0.293 ns |
|            |          | RM-ANOVA test             | WT: 11; Null: 13 | Decreasing speed: Speed 15: WT vs. Null | F = 6.064  | dfn=1, dfd=22 | 0.022 *  |
|            |          | RM-ANOVA test             | WT: 11; Null: 13 | Decreasing speed: Speed 30: WT vs. Null | F = 3.803  | dfn=1, dfd=22 | 0.064 ns |
|            |          | RM-ANOVA test             | WT: 11; Null: 13 | Decreasing speed: Speed 45: WT vs. Null | F = 8.308  | dfn=1, dfd=22 | 0.009 ** |
|            |          | RM-ANOVA test             | WT: 11; Null: 13 | Decreasing speed: Speed 60: WT vs. Null | F = 9.269  | dfn=1, dfd=22 | 0.006 ** |
| Event rate | Fig. S5A | Wilcoxon signed-rank test | 11               | Rest L2/3 WT: Day 1-2 vs. Day 9-10      | Z = -1.334 |               | 0.182 ns |
|            |          | Wilcoxon signed-rank test | 12               | Rest L2/3 Null: Day 1-2 vs. Day 9-10    | Z = -1.334 |               | 0.182 ns |
|            |          | Wilcoxon signed-rank test | 8                | Rest L5a WT: Day 1-2 vs. Day 9-10       | Z = -0.700 |               | 0.484 ns |
|            |          | Wilcoxon signed-rank test | 10               | Rest L5a Null: Day 1-2 vs. Day 9-10     | Z = -1.274 |               | 0.203 ns |
|            |          | Wilcoxon signed-rank test | 11               | Run L2/3 WT: Day 1-2 vs. Day 9-10       | Z = -2.578 |               | 0.010 *  |

|                         |          |                           |    |                                               |            |                  |       |    |
|-------------------------|----------|---------------------------|----|-----------------------------------------------|------------|------------------|-------|----|
|                         |          | Wilcoxon signed-rank test | 12 | Run L2/3<br>Null: Day 1-2 vs. Day 9-10        | Z = -2.275 |                  | 0.023 | *  |
|                         |          | Wilcoxon signed-rank test | 8  | Run L5a<br>WT: Day 1-2 vs. Day 9-10           | Z = -0.280 |                  | 0.779 | ns |
|                         |          | Wilcoxon signed-rank test | 10 | Run L5a<br>Null: Day 1-2 vs. Day 9-10         | Z = -1.172 |                  | 0.241 | ns |
| Event rate distribution | Fig. S5B | Kolmogorov-Smirnov test   | 13 | L2/3 WT<br>Speed 0:<br>Day 2 vs.<br>Day 10    |            |                  | 0.000 | *  |
|                         |          | Kolmogorov-Smirnov test   | 13 | L2/3 WT<br>Speed 60:<br>Day 2 vs.<br>Day 10   |            |                  | 0.000 | *  |
|                         |          | Kolmogorov-Smirnov test   | 14 | L2/3 Null<br>Speed 0:<br>Day 2 vs.<br>Day 10  |            |                  | 0.000 | *  |
|                         |          | Kolmogorov-Smirnov test   | 14 | L2/3 Null<br>Speed 60:<br>Day 2 vs.<br>Day 10 |            |                  | 0.000 | *  |
|                         |          | Kolmogorov-Smirnov test   | 11 | L5a WT<br>Speed 0:<br>Day 2 vs.<br>Day 10     |            |                  | 0.001 | ns |
|                         |          | Kolmogorov-Smirnov test   | 11 | L5a WT<br>Speed 60:<br>Day 2 vs.<br>Day 10    |            |                  | 0.001 | ns |
|                         |          | Kolmogorov-Smirnov test   | 13 | L5a Null<br>Speed 0:<br>Day 2 vs.<br>Day 10   |            |                  | 0.000 | *  |
|                         |          | Kolmogorov-Smirnov test   | 13 | L5a Null<br>Speed 60:<br>Day 2 vs.<br>Day 10  |            |                  | 0.000 | *  |
| ER width                | Fig. S5C | RM-ANOVA test             | 13 | L2/3 WT:<br>Speed 0 vs.<br>Speed 60           | F = 0.813  | dfn=1,<br>dfd=24 | 0.376 | ns |
|                         |          | RM-ANOVA test             | 14 | L2/3 Null:<br>Speed 0 vs.<br>Speed 60         | F = 6.121  | dfn=1,<br>dfd=26 | 0.020 | *  |
|                         |          | RM-ANOVA test             | 11 | L5a WT:<br>Speed 0 vs.<br>Speed 60            | F = 0.473  | dfn=1,<br>dfd=20 | 0.499 | ns |

|                                             |          |                           |                |                                                           |            |               |       |    |
|---------------------------------------------|----------|---------------------------|----------------|-----------------------------------------------------------|------------|---------------|-------|----|
|                                             |          | RM-ANOVA test             | 13             | L5a Null: Speed 0 vs. Speed 60                            | F = 0.191  | dfn=1, dfd=24 | 0.666 | ns |
| Probability of response change              | Fig. S6D | Two-tailed t-test         | WT: 7; Null: 5 | Probability of response change: WT vs. Null               | t = -2.054 | 10            | 0.069 | ns |
| Rest Corr. Coefficient ( $\times 10^{-2}$ ) | Fig. S7A | Wilcoxon signed-rank test | 11             | All pairs L2/3 WT: Day 1-2 vs. Day 9-10                   | Z = -0.889 |               | 0.374 | ns |
|                                             |          | Wilcoxon signed-rank test | 12             | All pairs L2/3 Null: Day 1-2 vs. Day 9-10                 | Z = -2.510 |               | 0.012 | *  |
|                                             |          | Wilcoxon signed-rank test | 8              | All pairs L5a WT: Day 1-2 vs. Day 9-10                    | Z = -0.280 |               | 0.779 | ns |
|                                             |          | Wilcoxon signed-rank test | 10             | All pairs L5a Null: Day 1-2 vs. Day 9-10                  | Z = 0.968  |               | 0.333 | ns |
|                                             |          | Wilcoxon signed-rank test | 8              | All pairs L2/3<->L5a WT: Day 1-2 vs. Day 9-10             | Z = -0.840 |               | 0.401 | ns |
|                                             |          | Wilcoxon signed-rank test | 10             | All pairs L2/3<->L5a Null: Day 1-2 vs. Day 9-10           | Z = -0.459 |               | 0.646 | ns |
|                                             |          | Wilcoxon signed-rank test | 11             | Strongly correlated pairs L2/3 WT: Day 1-2 vs. Day 9-10   | Z = 0.889  |               | 0.374 | ns |
|                                             |          | Wilcoxon signed-rank test | 12             | Strongly correlated pairs L2/3 Null: Day 1-2 vs. Day 9-10 | Z = -1.883 |               | 0.060 | ns |
|                                             |          | Wilcoxon signed-rank test | 8              | Strongly correlated pairs L5a WT: Day 1-2 vs. Day 9-10    | Z = -0.980 |               | 0.327 | ns |
|                                             |          | Wilcoxon signed-rank test | 10             | Strongly correlated pairs L5a Null: Day 1-                | Z = 0.764  |               | 0.445 | ns |



|                                                             |          |                           |                              |                                                                       |            |  |       |    |
|-------------------------------------------------------------|----------|---------------------------|------------------------------|-----------------------------------------------------------------------|------------|--|-------|----|
|                                                             |          |                           |                              | 2 vs. Day 9-10                                                        |            |  |       |    |
|                                                             |          | Wilcoxon signed-rank test | 8                            | Strongly correlated pairs<br>L2/3<->L5a<br>WT: Day 1-2 vs. Day 9-10   | Z = -0.420 |  | 0.674 | ns |
|                                                             |          | Wilcoxon signed-rank test | 10                           | Strongly correlated pairs<br>L2/3<->L5a<br>Null: Day 1-2 vs. Day 9-10 | Z = -0.255 |  | 0.799 | ns |
| All pairs Corr. Coefficient of naive mice during free run   | Fig. S9A | Wilcoxon signed-rank test | 10                           | L2/3 WT: Day 1 vs. Day 8                                              | Z = -0.866 |  | 0.386 | ns |
|                                                             |          | Wilcoxon signed-rank test | 13                           | L2/3 Null: Day 1 vs. Day 8                                            | Z = -0.245 |  | 0.807 | ns |
|                                                             |          | Wilcoxon signed-rank test | 7                            | L5a WT: Day 1 vs. Day 8                                               | Z = -1.014 |  | 0.310 | ns |
|                                                             |          | Wilcoxon signed-rank test | 8                            | L5a Null: Day 1 vs. Day 8                                             | Z = -0.840 |  | 0.401 | ns |
|                                                             |          | Wilcoxon signed-rank test | 7                            | L2/3<->L5a WT: Day 1 vs. Day 8                                        | Z = -0.845 |  | 0.398 | ns |
|                                                             |          | Wilcoxon signed-rank test | 8                            | L2/3<->L5a Null: Day 1 vs. Day 8                                      | Z = -0.140 |  | 0.889 | ns |
| All pairs Corr. Coefficient of Trained mice during free run | Fig. S9B | Wilcoxon signed-rank test | 11                           | L2/3 WT: Day 1-2 vs. Day 9-10                                         | Z = -2.134 |  | 0.033 | *  |
|                                                             |          | Wilcoxon signed-rank test | 12                           | L2/3 Null: Day 1-2 vs. Day 9-10                                       | Z = -3.059 |  | 0.002 | ** |
|                                                             |          | Wilcoxon signed-rank test | 8                            | L5a WT: Day 1-2 vs. Day 9-10                                          | Z = -0.280 |  | 0.779 | ns |
|                                                             |          | Wilcoxon signed-rank test | 10                           | L5a Null: Day 1-2 vs. Day 9-10                                        | Z = -1.784 |  | 0.074 | ns |
|                                                             |          | Wilcoxon signed-rank test | 8                            | L2/3<->L5a WT: Day 1-2 vs. Day 9-10                                   | Z = -1.820 |  | 0.069 | ns |
| Direct & Indirect Correlations                              | Fig. S10 | Mann-Whitney U Test       | WT Naive: 11; Null Naive: 12 | L2/3: WT Naive vs. Null Naive                                         | U = 71.000 |  | 0.786 | ns |

|                              |           |                                 |                                                                |                                   |            |               |       |     |
|------------------------------|-----------|---------------------------------|----------------------------------------------------------------|-----------------------------------|------------|---------------|-------|-----|
|                              |           | Mann-Whitney U Test             | WT Trained: 11; Null Trained: 12                               | L2/3: WT Trained vs. Null Trained | U = 57.000 |               | 0.608 | ns  |
|                              |           | Mann-Whitney U Test             | WT Naïve: 8; Null Naïve: 10                                    | L5a: WT Naïve vs. Null Naïve      | U = 24.000 |               | 0.786 | ns  |
|                              |           | Mann-Whitney U Test             | WT Trained: 8; Null Trained: 10                                | L5a: WT Trained vs. Null Trained  | U = 16.000 |               | 0.034 | *   |
| Direct Correlations          |           | Mann-Whitney U Test             | WT Naïve: 11; Null Naïve: 12                                   | L2/3: WT Naïve vs. Null Naïve     | U = 33.000 |               | 0.044 | *   |
|                              |           | Mann-Whitney U Test             | WT Trained: 11; Null Trained: 12                               | L2/3: WT Trained vs. Null Trained | U = 42.000 |               | 0.151 | ns  |
|                              |           | Mann-Whitney U Test             | WT Naïve: 8; Null Naïve: 10                                    | L5a: WT Naïve vs. Null Naïve      | U = 17.000 |               | 0.043 | *   |
|                              |           | Mann-Whitney U Test             | WT Trained: 8; Null Trained: 10                                | L5a: WT Trained vs. Null Trained  | U = 20.000 |               | 0.083 | ns  |
| Ladder test                  | Fig. S11  | RM-ANOVA test                   | WT Naïve: 15; WT Training: 19;                                 | WT: Naïve vs. Trained             | F = 2.018  | dfn=1, dfd=32 | 0.165 | ns  |
|                              |           | RM-ANOVA test                   | Null Naïve: 17; Null Training: 17                              | Null: Naïve vs. Trained           | F = 6.710  | dfn=1, dfd=32 | 0.014 | *   |
| Grip test                    | Fig. S12A | Two-way ANOVA; Sidak's Post-Hoc | WT Naïve: 16; WT Trained: 16; Null Naïve: 11; Null Trained: 10 | WT vs. Null                       | F = 39.841 | dfn=1, dfd=49 | 0.000 | *** |
|                              |           |                                 |                                                                | Naïve: WT vs. Null                |            |               | 0.000 | *** |
|                              |           |                                 |                                                                | Trained: WT vs. Null              |            |               | 0.000 | *** |
|                              |           |                                 |                                                                | Naïve vs. Trained                 | F = 0.478  | dfn=1, dfd=49 | 0.493 | ns  |
|                              |           |                                 |                                                                | WT: Naïve vs. Trained             |            |               | 0.254 | ns  |
|                              |           |                                 |                                                                | Null: Naïve vs. Trained           |            |               | 0.964 | ns  |
| Open field test Distance (m) | Fig. S12B | Two-way ANOVA; Sidak's Post-Hoc | WT Naïve: 18; WT Trained: 22; Null Naïve: 14; Null Trained: 20 | Distance: WT vs. Null             | F = 1.187  | dfn=1, dfd=70 | 0.280 | ns  |
|                              |           |                                 |                                                                | Distance: Naïve: WT vs. Null      |            |               | 0.955 | ns  |
|                              |           |                                 |                                                                | Distance: Trained: WT vs. Null    |            |               | 0.114 | ns  |

|                                                          |                                           |                                                                               |    |                                                            |                |                  |       |     |
|----------------------------------------------------------|-------------------------------------------|-------------------------------------------------------------------------------|----|------------------------------------------------------------|----------------|------------------|-------|-----|
|                                                          |                                           |                                                                               |    | Distance:<br>Naive vs.<br>Trained                          | F =<br>0.975   | dfn=1,<br>dfd=70 | 0.327 | ns  |
|                                                          |                                           |                                                                               |    | Distance:<br>WT: Naive<br>vs. Trained                      |                |                  | 0.990 | ns  |
|                                                          |                                           |                                                                               |    | Distance:<br>Null: Naive<br>vs. Trained                    |                |                  | 0.182 | ns  |
| Open field<br>test Velocity<br>(mm/s)                    | Two-way<br>ANOVA;<br>Sidak's Post-<br>Hoc | WT Naïve:<br>18; WT<br>Trained: 22;<br>Null Naïve:<br>14; Null<br>Trained: 20 |    | Velocity:<br>WT vs. Null                                   | F =<br>34.374  | dfn=1,<br>dfd=70 | 0.000 | *** |
|                                                          |                                           |                                                                               |    | Velocity:<br>Naïve: WT<br>vs. Null                         |                |                  | 0.000 | *** |
|                                                          |                                           |                                                                               |    | Velocity:<br>Trained: WT<br>vs. Null                       |                |                  | 0.002 | **  |
|                                                          |                                           |                                                                               |    | Velocity:<br>Naive vs.<br>Trained                          | F =<br>0.006   | dfn=1,<br>dfd=70 | 0.940 | ns  |
|                                                          |                                           |                                                                               |    | Velocity:<br>WT: Naive<br>vs. Trained                      |                |                  | 0.229 | ns  |
|                                                          |                                           |                                                                               |    | Velocity:<br>Null: Naive<br>vs. Trained                    |                |                  | 0.318 | ns  |
|                                                          |                                           |                                                                               |    |                                                            |                |                  |       |     |
| Lifespan<br>correlation<br>with<br>different<br>features | Fig.<br>S13                               | Pearson<br>bivariate<br>correlations<br>test                                  | 14 | Lifespan vs.<br>Two front<br>paws<br>Coordination<br>index | r =<br>0.332   |                  | 0.246 | ns  |
|                                                          |                                           | Pearson<br>bivariate<br>correlations<br>test                                  | 9  | Lifespan vs.<br>Open arm<br>entries                        | r = -<br>0.253 |                  | 0.512 | ns  |
|                                                          |                                           | Pearson<br>bivariate<br>correlations<br>test                                  | 9  | Lifespan vs.<br>Latency to<br>fall                         | r = -<br>0.059 |                  | 0.880 | ns  |

## Legends for Movies S1-S4

Movie S1. **Representative example of mouse running on computerized wheel.** Shown is a WT mouse running on the wheel set at speed 60 mm/sec. The video on the left was taken on Day 2; the video on the right was taken on Day 10. The most noticeable change is that early on, the WT mouse "skids" along the surface; by Day 10, it is accustomed to the rotation and changing speeds, and is able to better pace itself.

Movie S2. **Representative example of a Mecp2-null mouse running on computerized wheel.** Shown is a mutant mouse. Again, the biggest change from Day 2 (left) to Day 10 (right) is that the mouse is very tentative moving its limbs early on, but becomes more accustomed to the changing speeds and keeps up with the wheel by Day 10.

Movie S3. **A training-naïve Mecp2-null mouse on the ladder test.** The mice that were not trained on the computerized, changing-speed wheel have difficulty with the ladder test, moving slowly, lifting the tail for balance, occasionally missing rungs or stumbling.

Movie S4. **A trained Mecp2-null mouse performs like WT on the ladder test.** After training on the computerized wheel for 14 days, trained mutant mice moved easily and quickly across the ladder.
